# Supplementary material for: A unified framework for estimating country-specific cumulative incidence for 18 diseases stratified by polygenic risk
Source: PubMed Central journal article supplement (PMC11169548; doi:10.1038/s41467-024-48938-2), 2024-06-12
Supplement: 41467_2024_48938_MOESM3_ESM.pdf [file 41467_2024_48938_MOESM3_ESM.pdf]

## Descriptions of Additional Supplementary Files

**File Name:** Supplementary Data 1.

**Description:** Descriptive statistics (prevalence, follow-up and age at onset) for each phenotype by study.

**File Name:** Supplementary Data 2.

**Description:** Meta-analyzed Hazard Ratios per Standard Deviation of a disease relevant polygenic risk score. Age, sex and 'age and sex' stratified results also provided. The p-value is from a Wald test and HetPval is from Cochran's Q Test from the rma function in the metafor package.

**File Name:** Supplementary Data 3.

**Description:** Heterogeneity test for each age quartile for both sexes combined as well as stratified by sex for meta-analyzed hazard ratios. The heterogeneity p-value is from Cochran's Q Test.

**File Name:** Supplementary Data 4.

**Description:** Country-specific cumulative absolute risk for PGS strata across 19 phenotypes.

**File Name:** Supplementary Data 5.

**Description:** Country and sex-specific age at attainment of clinical risk threshold for Type 2 Diabetes

**File Name:** Supplementary Data 6.

**Description:** Country-specific age at attainment of clinical risk threshold for Breast Cancer.

**File Name:** Supplementary Data 7.

**Description:** Comparison of country-specific cumulative incidence when using biobank specific hazard ratios and meta-analysed hazard ratios in participants of European ancestries.

**File Name:** Supplementary Data 8.

**Description:** Harmonized definitions of flagship diseases using ICD-10 and ICD-9 codes.

**File Name:** Supplementary Data 9.

**Description:** Phenotype matching between Global Burden of Disease and UK Biobank

**File Name:** Supplementary Data 10.

**Description:** Genome-wide association study summary statistics used to compute PGS and sample overlap with each biobank.

**File Name:** Supplementary Data 11.

**Description:** Age of onset quartiles by study.

**File Name:** Supplementary Data 12.

**Description:** Phenotype definitions utilising primary care data from the UK Biobank
